# Supplementary material for: Multiplex Protein Biomarker Profiling in Patients with Familial Hypercholesterolemia
Source: MDPI journal article supplement (doi:10.3390/genes12101599), 2021-10-12
Supplement: s1 [file s1]

**Table S1** Plasma levels of proteins differentiating before and after therapy.

| <b>a/ LLD<sup>+</sup>/AF<sup>-</sup></b> |                                 |                  |           |                        |
|------------------------------------------|---------------------------------|------------------|-----------|------------------------|
| <b>Protein biomarker</b>                 | <b>Mean Linear ddCq (95%CI)</b> |                  | <b>FC</b> | <b><i>P corr</i></b>   |
|                                          | <b>Before</b>                   | <b>After</b>     |           |                        |
| TM                                       | 429 (402-457)                   | 387 (365-408)    | -1.109    | 1.6 x 10 <sup>-3</sup> |
| DKK-1                                    | 950 (742-1159)                  | 758 (589-926)    | -1.267    | 1.7 x 10 <sup>-3</sup> |
| CCL3                                     | 19 (15.2-22.9)                  | 15 (12.8-17.3)   | -1.234    | 1.8 x 10 <sup>-3</sup> |
| ST2                                      | 8.03 (6.2-9.9)                  | 10.1 (7.2-12.9)  | 1.219     | 3.7 x 10 <sup>-3</sup> |
| CD4                                      | 7.4 (6.8-8.2)                   | 6.7 (5.9-7.4)    | -1.116    | 5.1 x 10 <sup>-3</sup> |
| PDGF subunit B                           | 1439 (1166-1711)                | 1148 (807-1486)  | -1.420    | 5.6 x 10 <sup>-3</sup> |
| AGRP                                     | 21.1 (18.7-23.6)                | 17.6 (15.4-19.8) | -1.206    | 6.6 x 10 <sup>-3</sup> |
| IL18                                     | 299 (246-352)                   | 255 (213-297)    | -1.152    | 6.8 x 10 <sup>-3</sup> |
| THPO                                     | 8.6 (7.7-9.4)                   | 7.4 (6.7-8.2)    | -1.154    | 8.3 x 10 <sup>-3</sup> |
| LOX1                                     | 103 (87-119)                    | 88 (75-101)      | -1.157    | 9.5 x 10 <sup>-3</sup> |
|                                          |                                 |                  |           |                        |
| <b>b/ LLD<sup>+</sup>/AF<sup>+</sup></b> |                                 |                  |           |                        |
| <b>Protein biomarker</b>                 | <b>Mean Linear ddCq (95%CI)</b> |                  | <b>FC</b> | <b><i>P corr</i></b>   |
|                                          | <b>Before</b>                   | <b>After</b>     |           |                        |
| LDLR                                     | 25.7 (16.5-34.9)                | 12.1 (8.2-16.1)  | -2.222    | 1.6 x 10 <sup>-6</sup> |
| OPN                                      | 191 (137-245)                   | 367 (284-451)    | 1.975     | 4.3 x 10 <sup>-6</sup> |
| PCSK9                                    | 14.9 (10.1-19.6)                | 10.6 (6.1-15.1)  | -1.544    | 1.1 x 10 <sup>-4</sup> |
| MMP-3                                    | 111 (79-143)                    | 77 (60-94)       | -1.372    | 1.9 x 10 <sup>-4</sup> |
| COL1A1                                   | 17.7 (14.4-21)                  | 22.8 (18.8-26.7) | 1.289     | 2.3 x 10 <sup>-4</sup> |
| GDF-2                                    | 14.5 (11.6-17.4)                | 8.7 (6.4-11.1)   | -1.738    | 3.7 x 10 <sup>-4</sup> |
| KLK6                                     | 17.1 (14.8-19.4)                | 23.2 (19.9-26.6) | 1.356     | 4.1 x 10 <sup>-4</sup> |
| CTRC                                     | 1417 (1201-1633)                | 967 (751-1183)   | -1.510    | 4.3 x 10 <sup>-4</sup> |
| IL-4RA                                   | 4.4 (3.9-4.8)                   | 6.1 (5.1-7.1)    | 1.367     | 4.8 x 10 <sup>-4</sup> |
| SORT1                                    | 239 (208-270)                   | 150 (117-184)    | -1.688    | 7.7 x 10 <sup>-4</sup> |
| PLC                                      | 142 (116-167)                   | 178 (154-203)    | 1.277     | 9.7 x 10 <sup>-4</sup> |
| TNF-R1                                   | 43.4 (33.6-53.1)                | 49.9 (41.1-58.9) | 1.172     | 2.7 x 10 <sup>-3</sup> |
| PTX3                                     | 6.2 (5.4-6.9)                   | 7.8 (6.5-9.1)    | 1.234     | 2.8 x 10 <sup>-3</sup> |
| VEGFD                                    | 159 (135-184)                   | 129 (107-151)    | -1.242    | 2.9 x 10 <sup>-3</sup> |
| IL-27                                    | 12.1 (9.5-14.7)                 | 9.6 (7.9-11.2)   | -1.250    | 3.2 x 10 <sup>-3</sup> |
| GLO1                                     | 36.2 (25.0-47.5)                | 61.8 (43.4-80.3) | 1.664     | 4.2 x 10 <sup>-3</sup> |
| CCL24                                    | 64.1 (42.7-85.5)                | 48.9 (34.2-63.3) | -1.279    | 4.8 x 10 <sup>-3</sup> |
| KIM1                                     | 345 (217-474)                   | 236 (151-321)    | -1.342    | 5.2 x 10 <sup>-3</sup> |

Data are expressed as mean linear ddCq and 95%CI. LLD<sup>+</sup>/AF<sup>-</sup> FH patients under lipid-lowering drugs therapy-only; LLD<sup>+</sup>/AF<sup>+</sup> - patients under combined long-term LDL apheresis/LLD; *Pcorr* value corrected for multiple comparisons (Benjamini–Hochberg correction); FC (fold-change) between group medians of linear ddCq

**Table S2** Comparison of LDLR protein concentration between *LDLR* heterozygotes vs homozygotes.

| <b>LDLR protein</b>                      | <b>Mean Linear ddCq (95%CI)</b> |                    |                 |
|------------------------------------------|---------------------------------|--------------------|-----------------|
| <b>a/ LLD<sup>+</sup>/AF<sup>+</sup></b> | <b>Heterozygotes</b>            | <b>Homozygotes</b> | <b><i>P</i></b> |
| <b>Before treatment</b>                  | 31.2 (16.5-45.8)                | 16.9 (13.9-19.9)   | 0.01            |
| <b>After treatment</b>                   | 14.9 (9.3-20.5)                 | 7.7 (4.4-10.9)     | 0.05            |

Data are expressed as mean linear ddCq and 95%CI.

**Table S3** Plasma lipid level changes with respect to treatment.

|                      | <b>LLD<sup>+</sup>/AF<sup>-</sup></b> |              | <b>p value</b> | <b>LLD<sup>+</sup>/AF<sup>+</sup></b> |              | <b>P value</b> |
|----------------------|---------------------------------------|--------------|----------------|---------------------------------------|--------------|----------------|
|                      | <b>before</b>                         | <b>after</b> |                | <b>before</b>                         | <b>after</b> |                |
| Total<br>Cholesterol | 7.5±1.7                               | 4.7±0.7      | <0.001         | 5.3±1.6                               | 1.8±0.4      | <0.001         |
| LDL<br>Cholesterol   | 5.6±1.6                               | 2.8±0.6      | <0.001         | 3.3±1.4                               | 0.6±0.3      | <0.001         |
| HDL<br>Cholesterol   | 1.5±0.4                               | 1.6±0.4      | ns             | 1.3±0.4                               | 0.9±0.2      | <0.001         |
| Triglycerides        | 1.6±0.9                               | 1.5±0.8      | ns             | 1.8±1.3                               | 0.9±0.7      | 0.002          |

The data are expressed as the mean ± standard deviation (SD). Bonferroni correction was applied on significance levels. LDL - low density lipoprotein; HDL - high density lipoprotein, Lipid concentration is expressed in mmol/L

**Table S4** Classification of protein biomarkers according to biological process. Data were drawn from <https://www.olink.com/products/> for biological processes and from [www.uniprot.org](http://www.uniprot.org) for the molecular mass of proteins.

| <b>a/ LLD<sup>+</sup>/AF<sup>-</sup></b> |                             |                                                                                                                                                                  |
|------------------------------------------|-----------------------------|------------------------------------------------------------------------------------------------------------------------------------------------------------------|
| <b>Protein</b>                           | <b>Molecular mass (kDa)</b> | <b>Biological processes</b>                                                                                                                                      |
| TM                                       | 60.3                        | coagulation, platelet activation, wound healing                                                                                                                  |
| DKK-1                                    | 28.7                        |                                                                                                                                                                  |
| CCL3                                     | 10.1                        |                                                                                                                                                                  |
| ST2                                      | 63.4                        | MAPK cascade                                                                                                                                                     |
| CD4                                      | 51                          | inflammatory response                                                                                                                                            |
|                                          |                             | cell adhesion, immune response                                                                                                                                   |
| PDGF subunit B                           | 27.3                        | coagulation, heart development, MAPK cascade, platelet activation, regulation of blood pressure, response to hypoxia, response to peptide hormone, wound healing |
| AGRP                                     | 14.4                        | response to peptide hormone                                                                                                                                      |
| IL18                                     | 22.3                        | angiogenesis, blood vessel morphogenesis, cell adhesion, immune response, inflammatory response,                                                                 |
| THPO                                     | 37.8                        | MAPK cascade                                                                                                                                                     |
| LOX1                                     | 31                          | inflammatory response, proteolysis                                                                                                                               |
|                                          |                             |                                                                                                                                                                  |
| <b>b/ LLD<sup>+</sup>/AF<sup>+</sup></b> |                             |                                                                                                                                                                  |
| <b>Protein</b>                           | <b>Molecular mass (kDa)</b> | <b>Biological processes</b>                                                                                                                                      |
| LDLR                                     | 95.4                        | catabolic process,                                                                                                                                               |
| OPN                                      | 35                          | Wound healing, immune response, inflammatory response                                                                                                            |
| PCSK9                                    | 74                          | catabolic process, proteolysis, response to peptide hormone                                                                                                      |
| MMP-3                                    | 54                          | proteolysis                                                                                                                                                      |
| COL1A1                                   | 139                         | catabolic processes, cell adhesion, coagulation, platelet activation, response to peptide hormone, wound healing                                                 |
| GDF-2                                    | 47.3                        | angiogenesis, blood vessel morphogenesis, MAPK cascade                                                                                                           |
| KLK6                                     | 26.8                        | wound healing, proteolysis                                                                                                                                       |
| CTRC                                     | 29.5                        | proteolysis                                                                                                                                                      |
| IL-4RA                                   | 89.7                        | immune response, inflammatory response,                                                                                                                          |
| SORT1                                    | 77-92                       | response to peptide hormone,                                                                                                                                     |
| PLC                                      | 470                         | Angiogenesis, blood vessel morphogenesis, catabolic process,                                                                                                     |
| TNF-R1                                   | 24-50                       | inflammatory response                                                                                                                                            |
| PTX3                                     | 42                          | inflammatory response,                                                                                                                                           |
| VEGFD                                    | 40.4                        | angiogenesis, blood vessel morphogenesis, response to hypoxia,                                                                                                   |
| IL-27                                    | 25.4-27.5                   | cell adhesion,                                                                                                                                                   |
| GLO1                                     | 20.8                        | inflammatory response                                                                                                                                            |
| CCL24                                    | 13.1                        | angiogenesis, blood vessel morphogenesis, MAPK cascade, chemotaxis,                                                                                              |
| KIM1                                     | 39.3                        | inflammatory response                                                                                                                                            |
